# Supplementary material for: Sacral-Nerve-Sparing Planning Strategy in Pelvic Sarcomas/Chordomas Treated with Carbon-Ion Radiotherapy
Source: MDPI journal article supplement (doi:10.3390/cancers16071284), 2024-03-26
Supplement: s1 [file s1]

**Supplementary Methods:**

To assess optimal  $D_{RBE}$  and LETd threshold we evaluated all the thresholds with corresponding AUC values  $> 0.7$  and then selected one with highest safe  $D_{RBE}$  and LETd (Figure 4). RILSN-free survival at  $D_{RBE|LEM-I}$  cutoff = 64 Gy (RBE), in patients with  $< 12\%$  voxels of sacral-nerves-to-spare receiving LETd  $< 55$  keV/ $\mu$ m had significantly higher 2-year RILSN-free survival (100%) than those with LETd  $\geq 55$  keV/ $\mu$ m (75%) ( $p < 0.05$ ). The sensitivity at  $D_{RBE|LEM-I}$  cutoff = 64 Gy (RBE), and LETd = 55 keV/ $\mu$ m was 100% and specificity was 67%. Hence,  $D_{RBE|LEM-I}$  cutoff = 64 Gy (RBE), and LETd = 55 keV/ $\mu$ m was considered appropriate predictor. Appropriate thresholds for whole sacral-nerves and cauda equina were selected following the same approach.
