# Supplementary material for: Sacral-Nerve-Sparing Planning Strategy in Pelvic Sarcomas/Chordomas Treated with Carbon-Ion Radiotherapy
Source: MDPI journal article supplement (doi:10.3390/cancers16071284), 2024-03-26
Supplement: s1 [file s1]

**Supplementary Table S1: Abbreviation list:**

|                                    |                                                       |
|------------------------------------|-------------------------------------------------------|
| CIRT                               | Carbon-ion therapy                                    |
| SNSo-CIRT                          | Sacral nerve sparing optimized carbon-ion therapy     |
| RBE                                | Relative Biological effectiveness                     |
| LEM-I                              | Local effect model-I                                  |
| mMKM                               | Modified microdosimetric kinetic model                |
| MBM                                | Mixed beam model                                      |
| LETd                               | D/ose-averaged linear energy transfer                 |
| HD-CTV                             | High dose clinical target volume                      |
| $D_{RBE LEM-I}$ , $D_{RBE mMKM}$   | RBE-weighted dose (calculated by LEM-I /mMKM model)   |
| $D_{RBE LEM-I 'x'%}$ or $D_{'x'%}$ | RBE weighted dose received by 'x'% target/OAR volume  |
| $D_{'x'cm}$                        | RBE weighted dose received by 'x' cm length of nerve  |
| $LETd_{'x'%}$                      | LETd received by 'x'% target/OAR volume               |
| $LETd_{'x'cm}$                     | LETd received by 'x' cm length of nerve               |
| $D_{RBE-filtered-LETd}$            | LETd in volume receiving > $D_{RBE}$ cutoff/threshold |
