# Supplementary material for: Sacral-Nerve-Sparing Planning Strategy in Pelvic Sarcomas/Chordomas Treated with Carbon-Ion Radiotherapy
Source: MDPI journal article supplement (doi:10.3390/cancers16071284), 2024-03-26
Supplement: s1 [file s1]

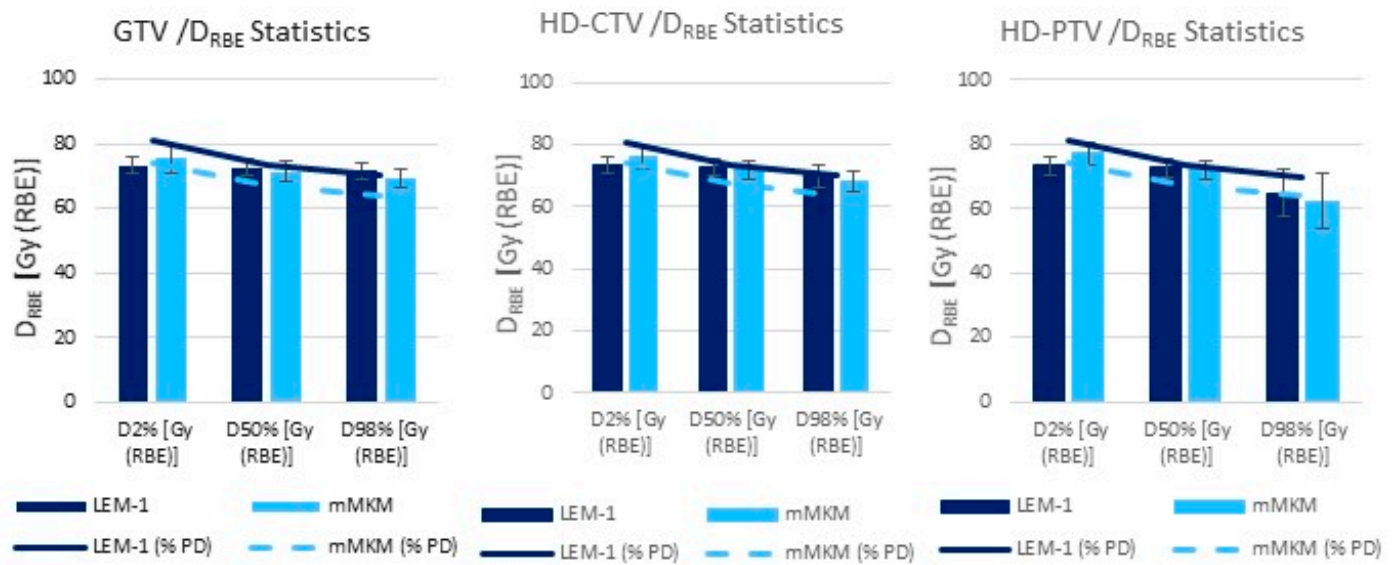

Figure S1.  $D_{RBE|LEM-1}$  and  $D_{RBE|mMKM}$  statistics for GTV, HD-CTV and HD-PTV : D2%, D50%, D98%.  
Solid and dashed line represent threshold for respective clinical goal.

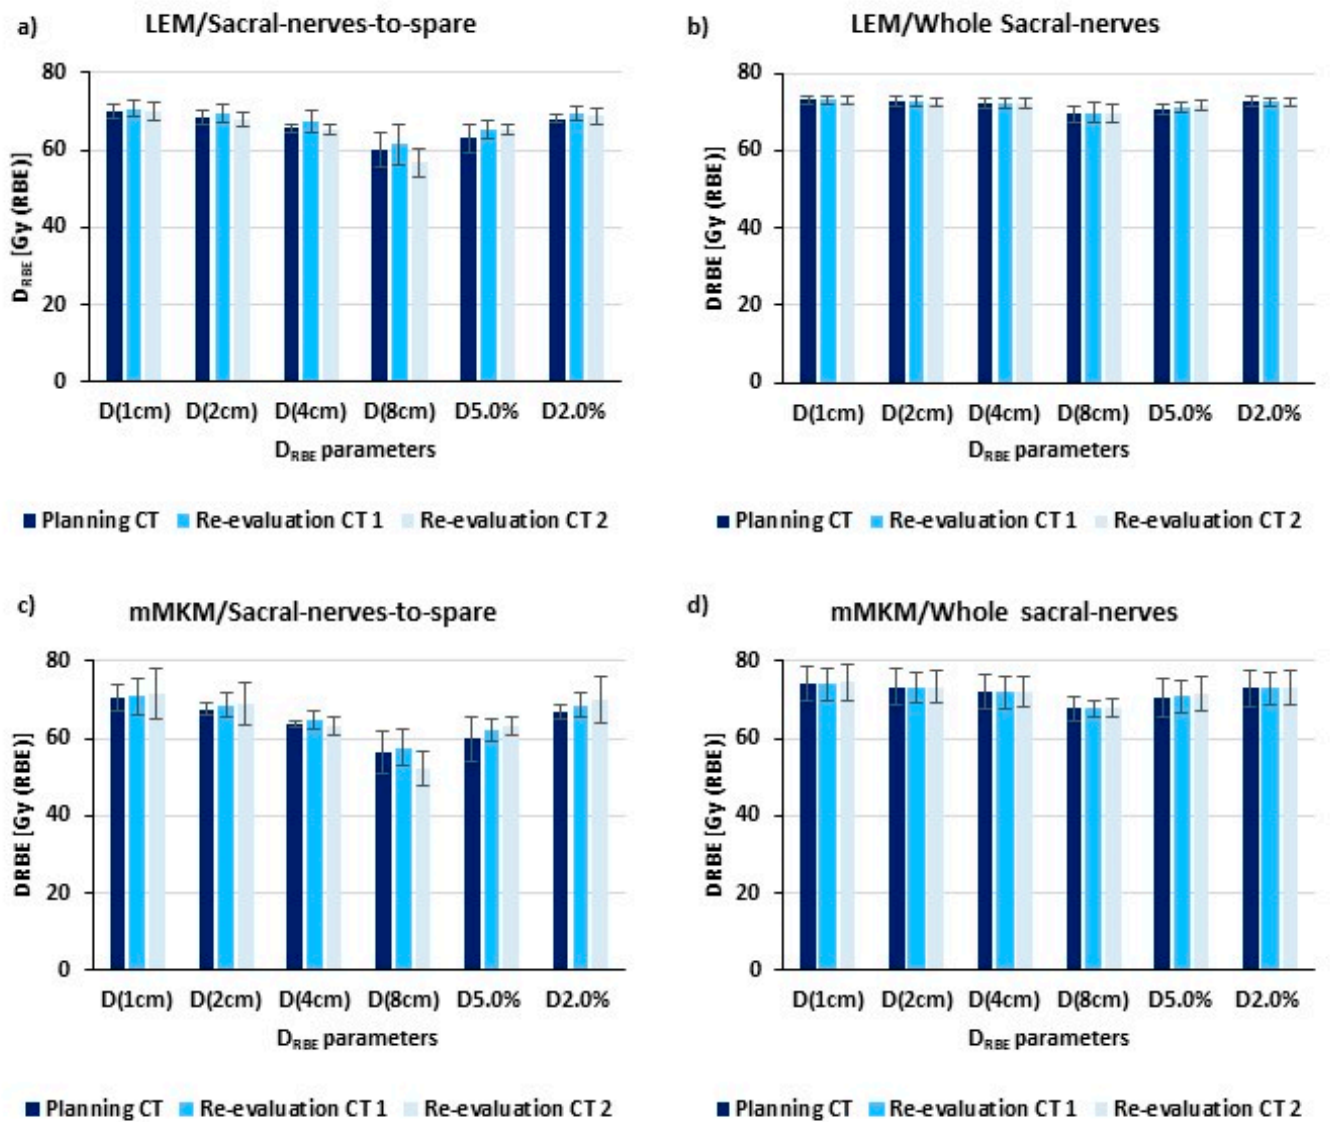

**Figure S2.** Robustness analysis SNSo-CIRT strategy: Comparison of  $D_{RBE|LEM-I}$  and  $D_{RBE|mMKM}$  statistics for sacral-nerve-to-spare and whole sacral-nerve on re-evaluation CT scans compared to original planning CT. (n = 7).

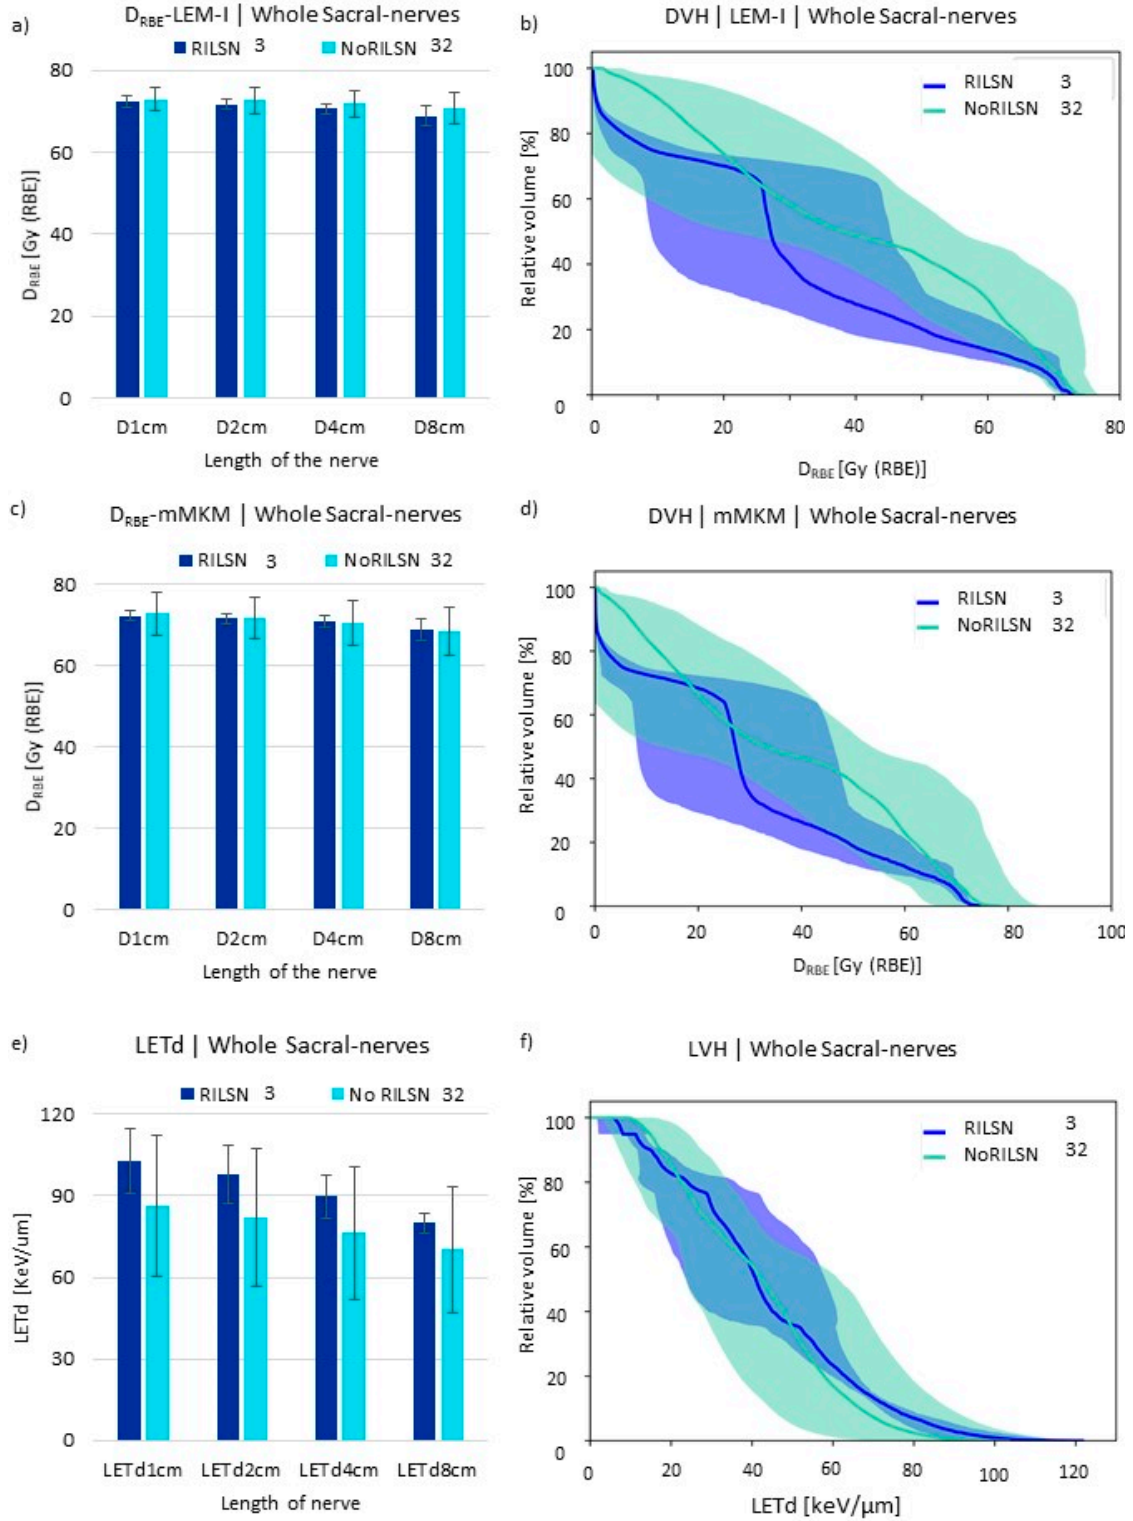

Figure S3.  $D_{RBE}^{LEM-I}$  and  $D_{RBE}^{mMKM}$  and LETd statistics. a) LEM-I doses, c) mMKM doses and e) LETd received by 1 cm, 2 cm, 4 cm and 8 cm lengths of the whole sacral nerves in patients with and without RILSN. DVH analysis of whole sacral nerves in patients with and without RILSN with respect to b) LEM-I and d) mMKM model-based dose calculation. f) Relative- volume LVH of the whole sacral nerves of patient with RILSN and those without RILSN.

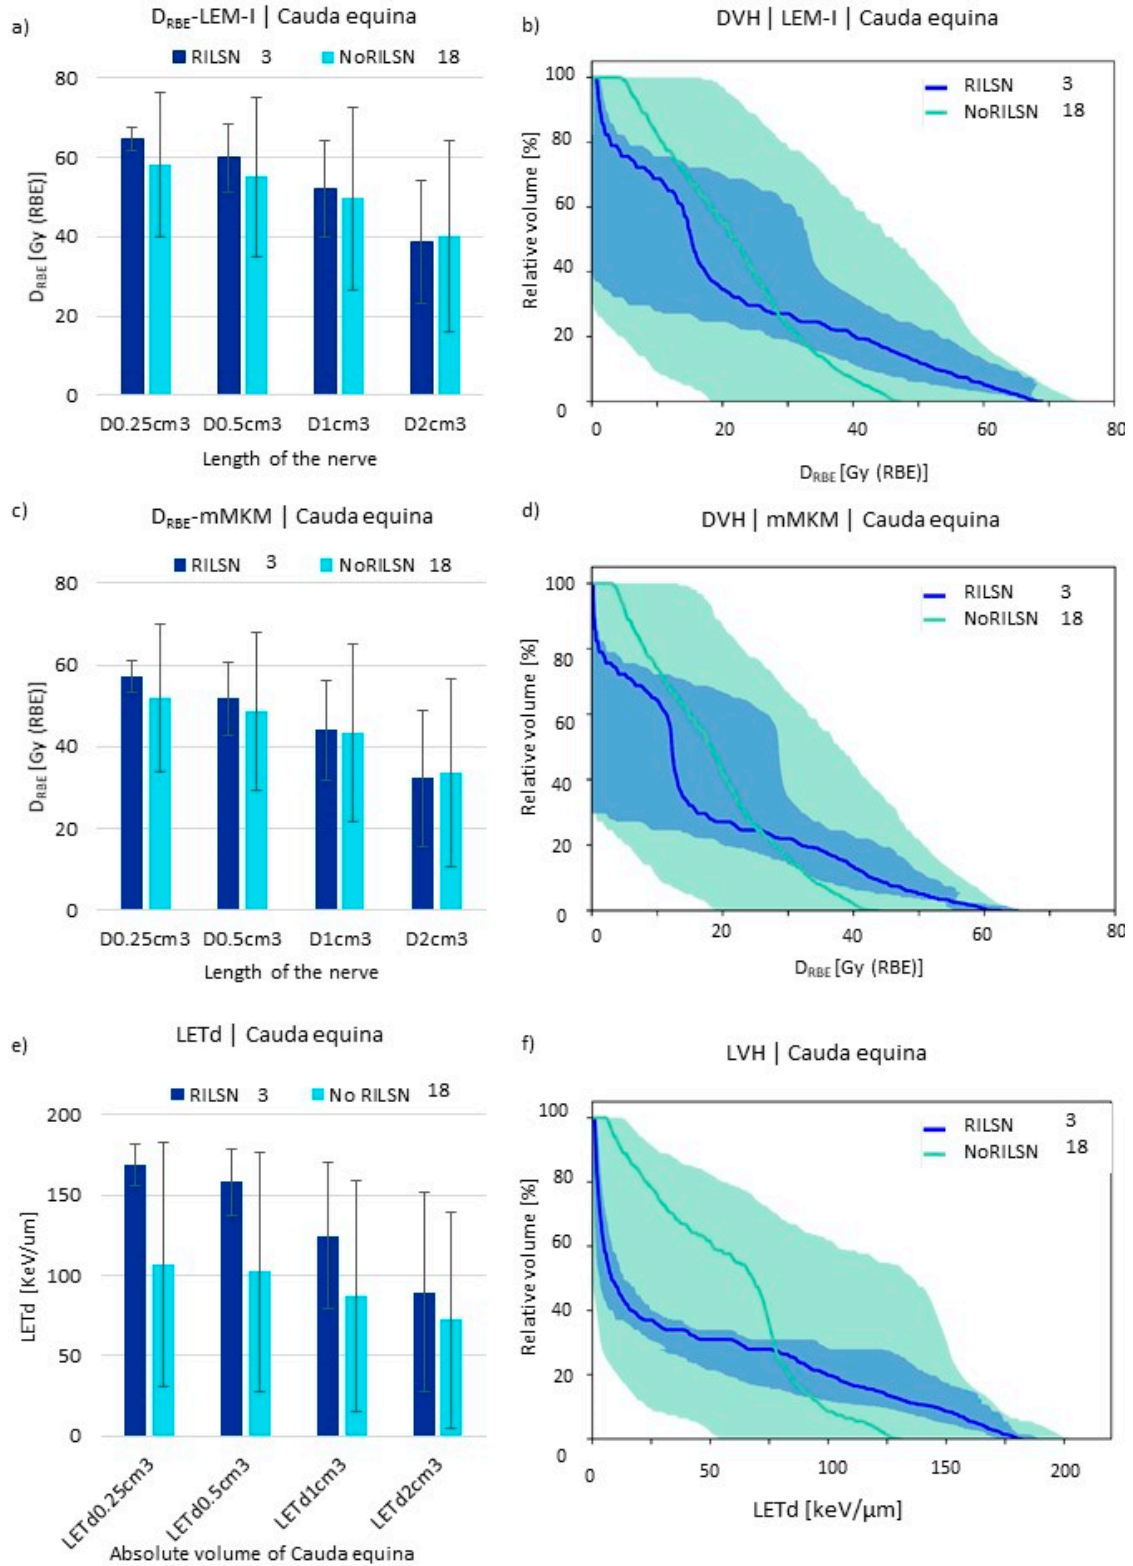

**Figure S4.**  $D_{RBE|LEM-I}$  and  $D_{RBE|mMKM}$  and LETd statistics. a) LEM-I doses, c) mMKM doses and e) LETd received by doses to 0.25 cm<sup>3</sup>, 0.5 cm<sup>3</sup>, 1 cm<sup>3</sup>, 2 cm<sup>3</sup> of cauda equina in patients with and without RILSN. DVH analysis of cauda equina in patients with and without RILSN with respect to b) LEM-I and d) mMKM model-based dose calculation. f) Relative- volume LVH of the cauda equina of patient with RILSN and those without RILSN. ( $p$  = not significant).

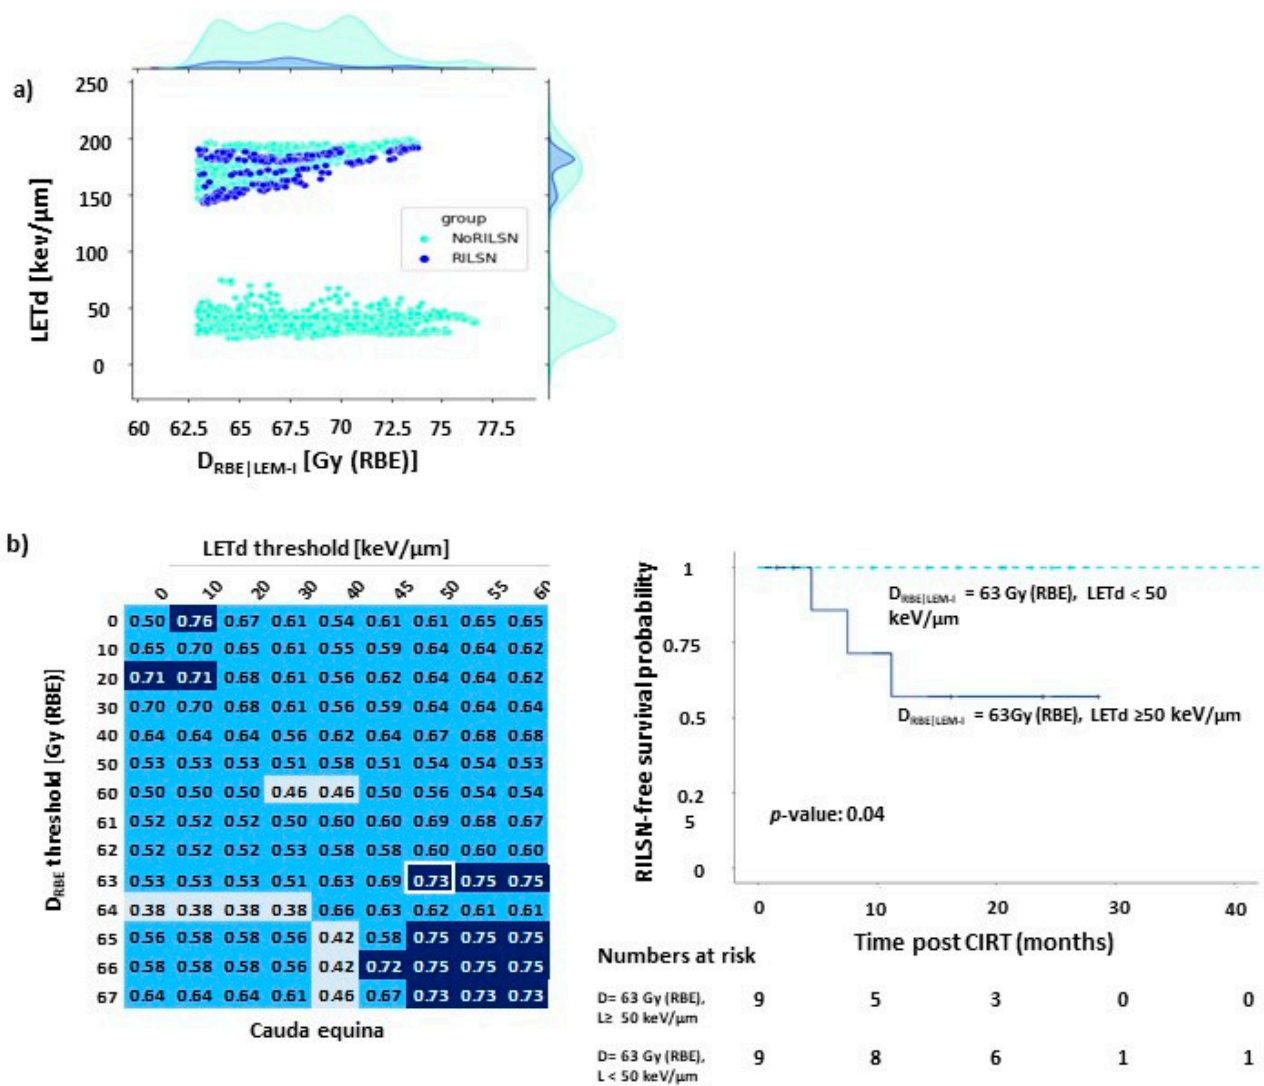

**Figure S5:** Voxel by voxel LETd analysis plot for a) cauda equina at  $D_{RBE}$  cutoff = 63 Gy (RBE). AUC value matrix for  $D_{RBE}$ -filtered-LETd for b) cauda equina. c) Kaplan Meier survival analysis of cases with for  $D_{RBE|LEM-I}$  cutoff = 63 Gy (RBE) and LETd cutoff = 50 keV/and  $\mu$ m for (Note: n: RILSN = 3, NoRILSN = 15).
